# Supplementary material
Source: MDPI journal article supplement (https://www.mdpi.com/2075-163X/13/4/465)
Supplement: s1 [file s1]

## Electronic Supplementary Information

### UV Induced Photocatalytic Degradation of Caffeine Using H-beta Zeolite-Anatase Composite

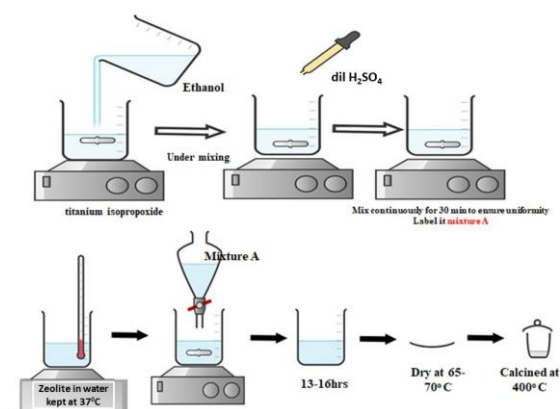

**Figure S1.** Schematic representation of two step sol-gel process used to prepare the THB.

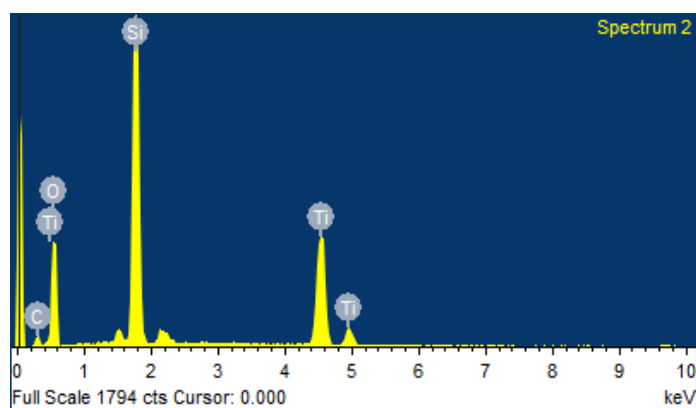

**Figure S2.** The EDAX spectral distribution of THB composite

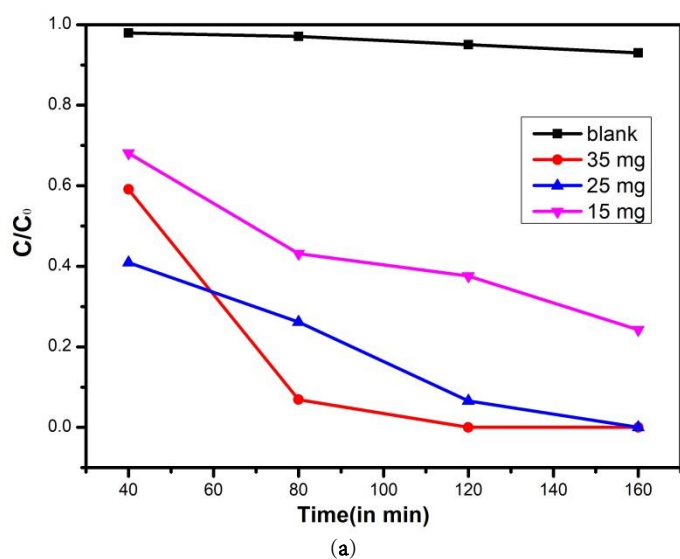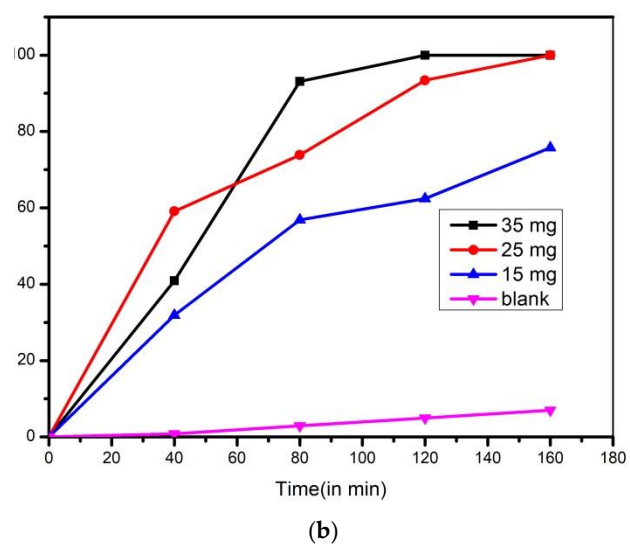

Figure S3 (a) Photocatalytic degradation profile for 5 ppm caffeine solution (b) Degradation efficiency

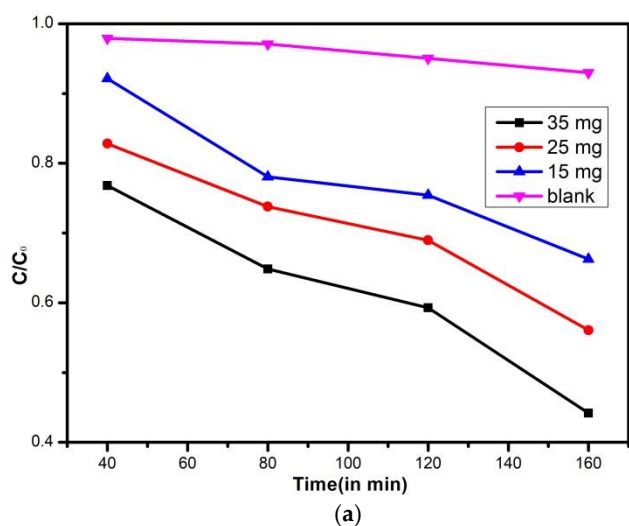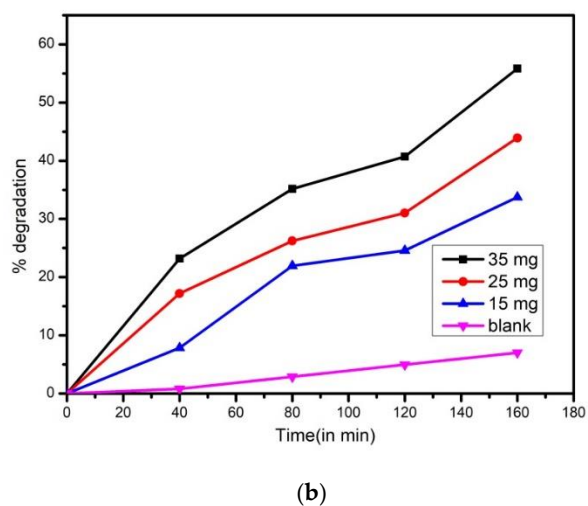

Figure S4 (a) Photocatalytic degradation profile for 15 ppm caffeine solution (b) Degradation efficiency
